# Supplementary material
Source: Research Square preprint supplement (doi:10.21203/rs.3.rs-8999580/v1)
Supplement: Supplementary file 1 [file 8b027780083de35f07514161.docx]

**Supplementary figures and figure legends**

**for identification of monitoring panels and hub genes for heterogeneous relapse outcomes in acute lymphoblastic leukemia**

Xin He,et al.

*** Correspondence author:**Pu Li, Department of Clinical Laboratory, Chongqing University Jiangjin Hospital, School of Medicine, Chongqing University, No.725 Jiangzhou Avenue, Jiangjin District, Chongqing, 402260, China. Phone: 86.02347521342; Email: lipu.cqu@cqu.edu.cn.


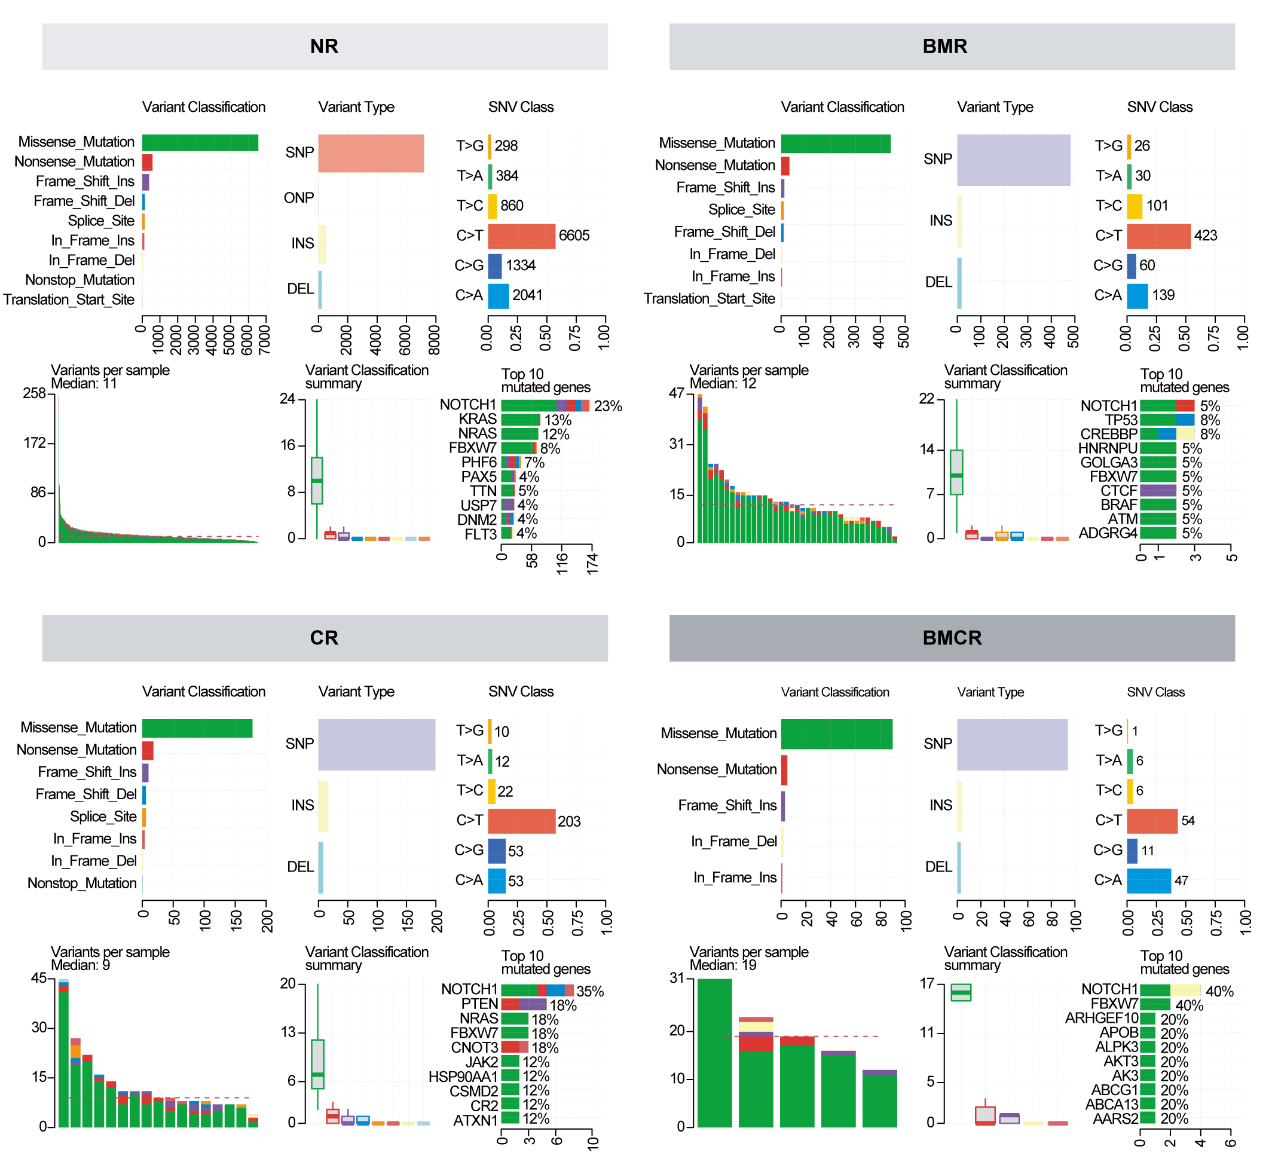


**Fig. S1. Summary of Mutational Profiles in ALL Relapse Outcome Groups**

Summary plot depicting mutation distributions across ALL relapse outcome groups.

SNP: Single Nucleotide Polymorphism; ONP: Oligonucleotide Polymorphism; INS: Insertion; DEL: Deletion


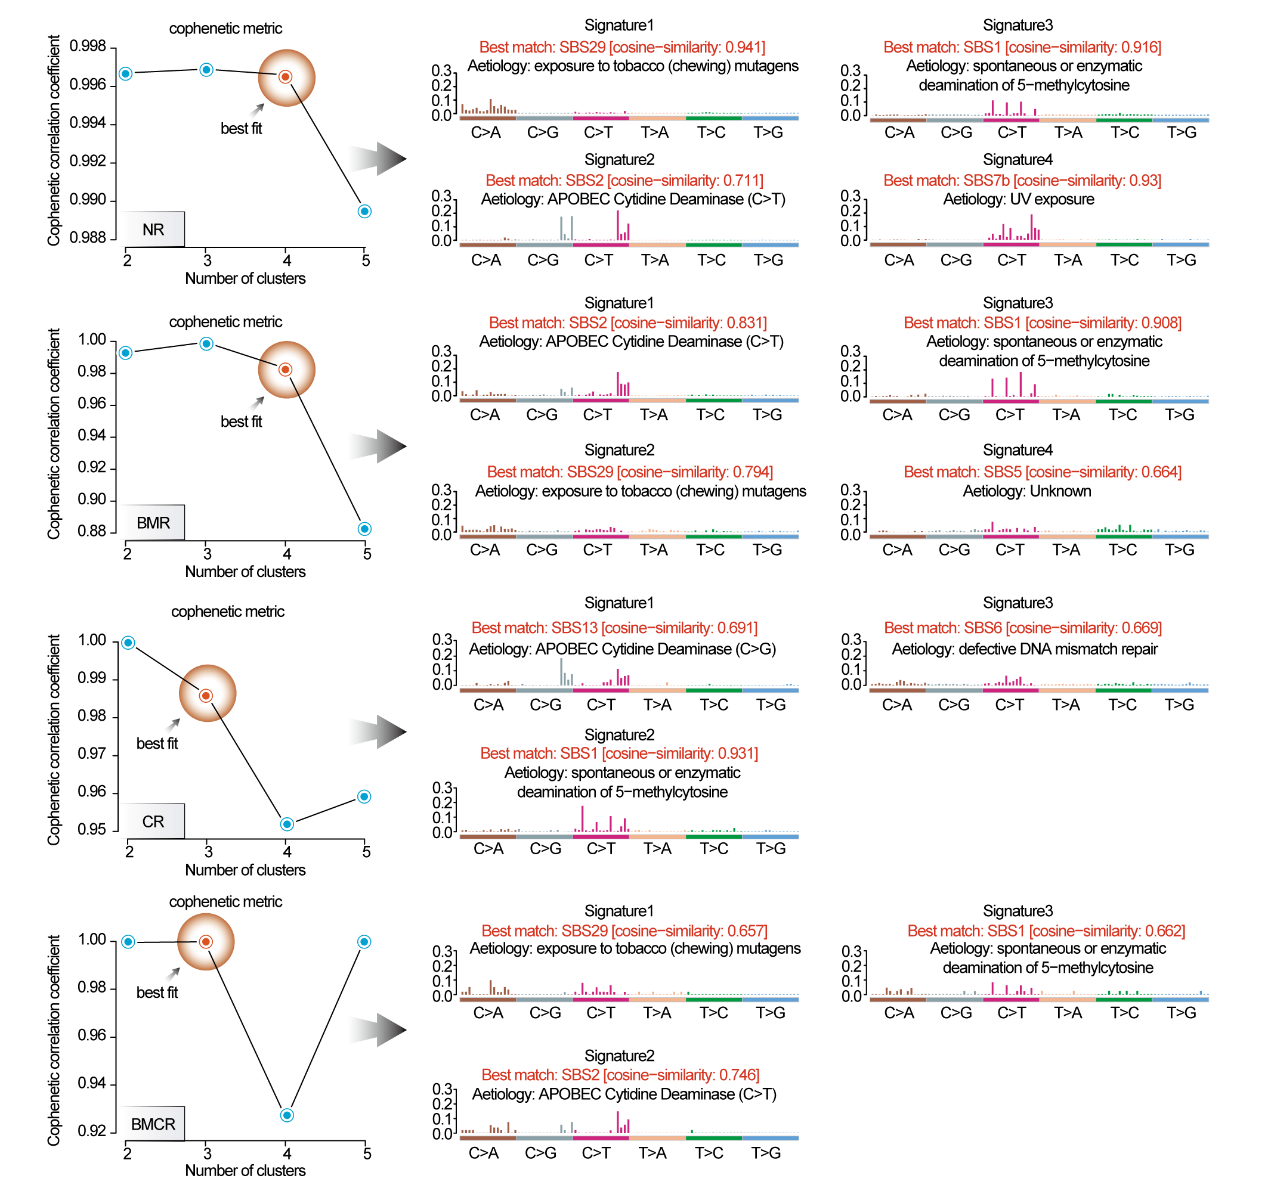


**Fig. S2. Mutational Signature Analysis of ALL Relapse Outcome Groups Using COSMIC Database**

Elbow plots of cophenetic correlation metrics (left) and mutational signature plots (right) for each relapse outcome group.


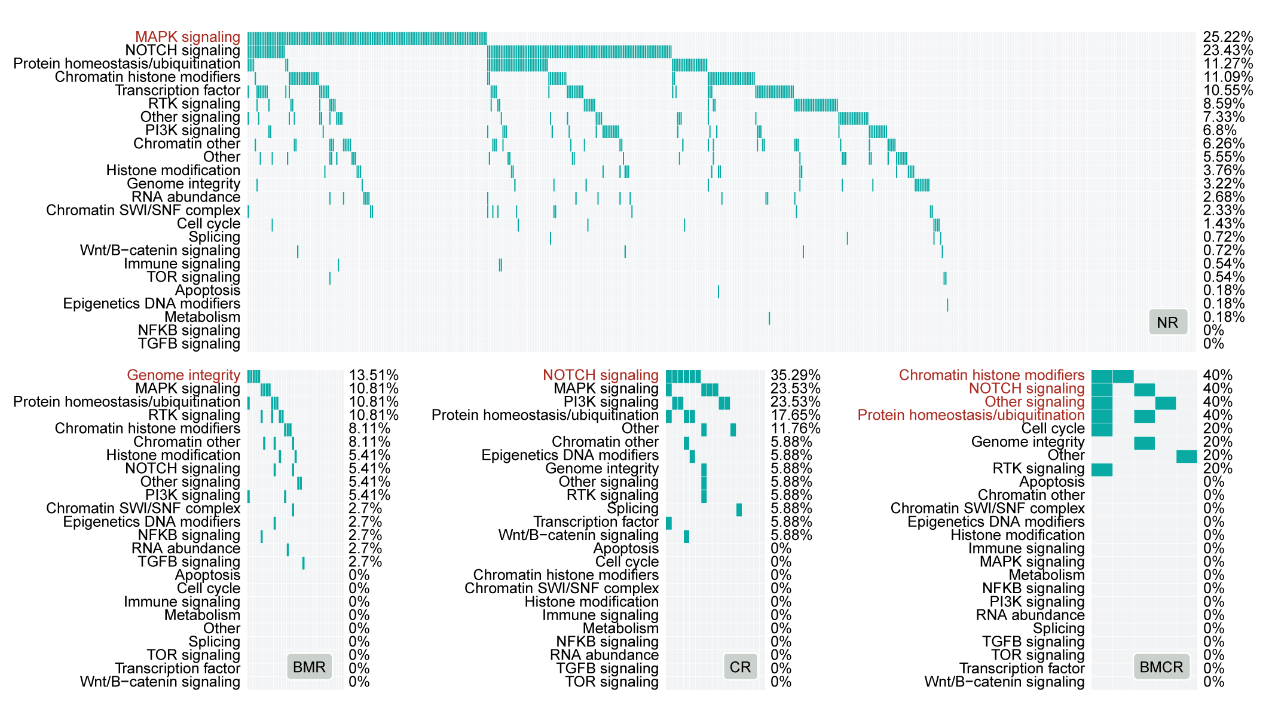


**Fig. S3. Oncogenic Pathway Alterations in ALL Relapse Outcome Groups**

Waterfall plots illustrating mutation frequencies of 24 oncogenic pathways across relapse outcome groups.


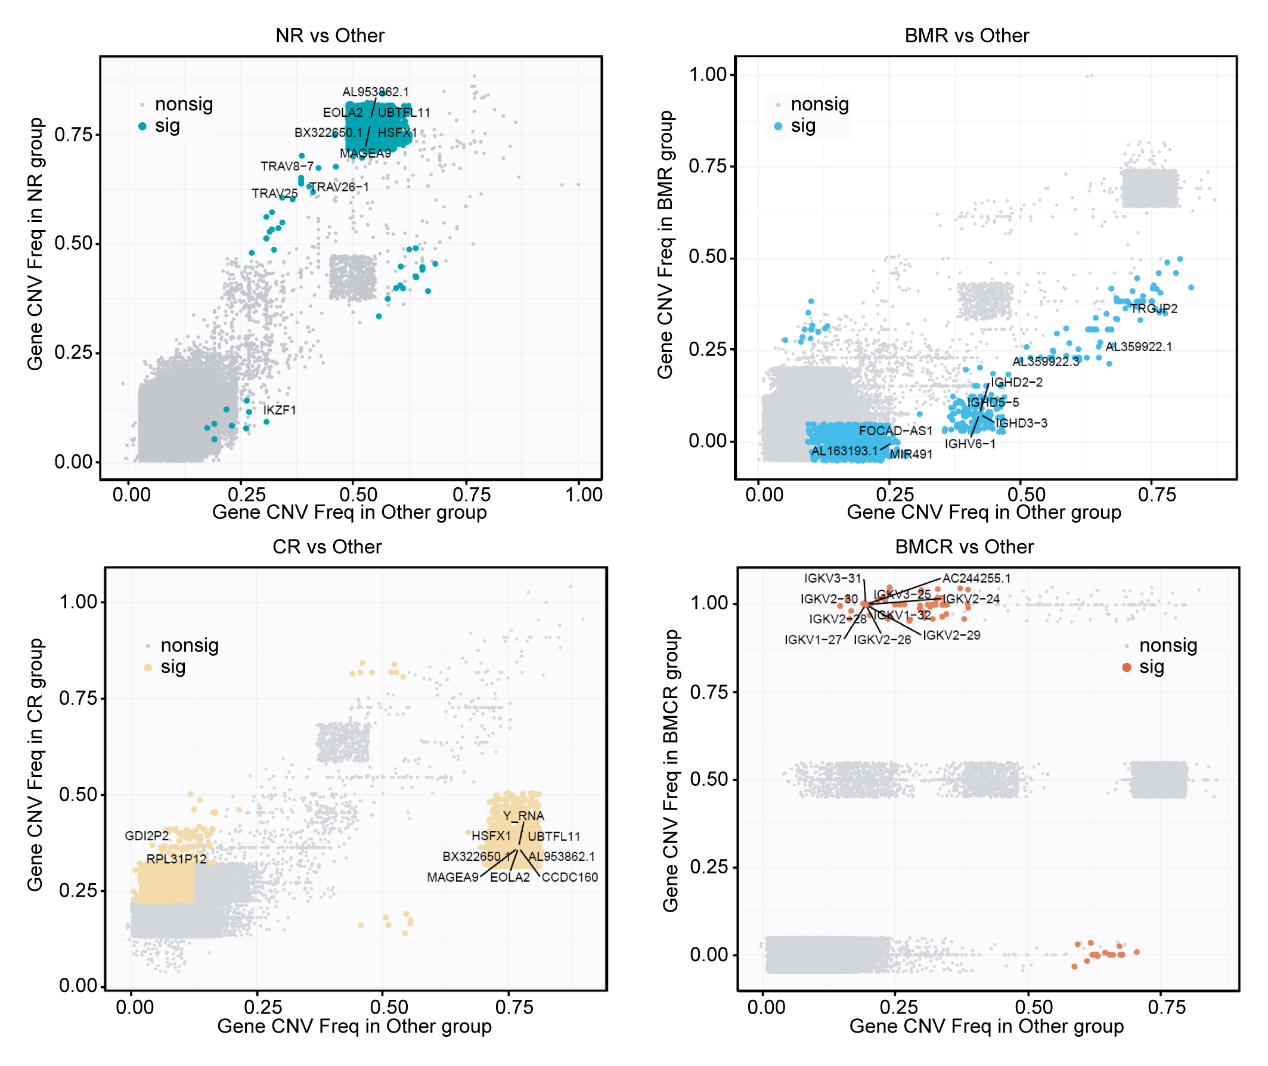


**Fig. S4. Differential CNV Gene Volcano Plots in ALL Relapse Outcomes**

Bubble plot displaying CNV frequencies of differential CNV genes in Other vs. NR/BMR/CR/BMCR comparisons. Top 10 differentially altered genes (ranked by p-value) are labeled with gene symbols in each group.


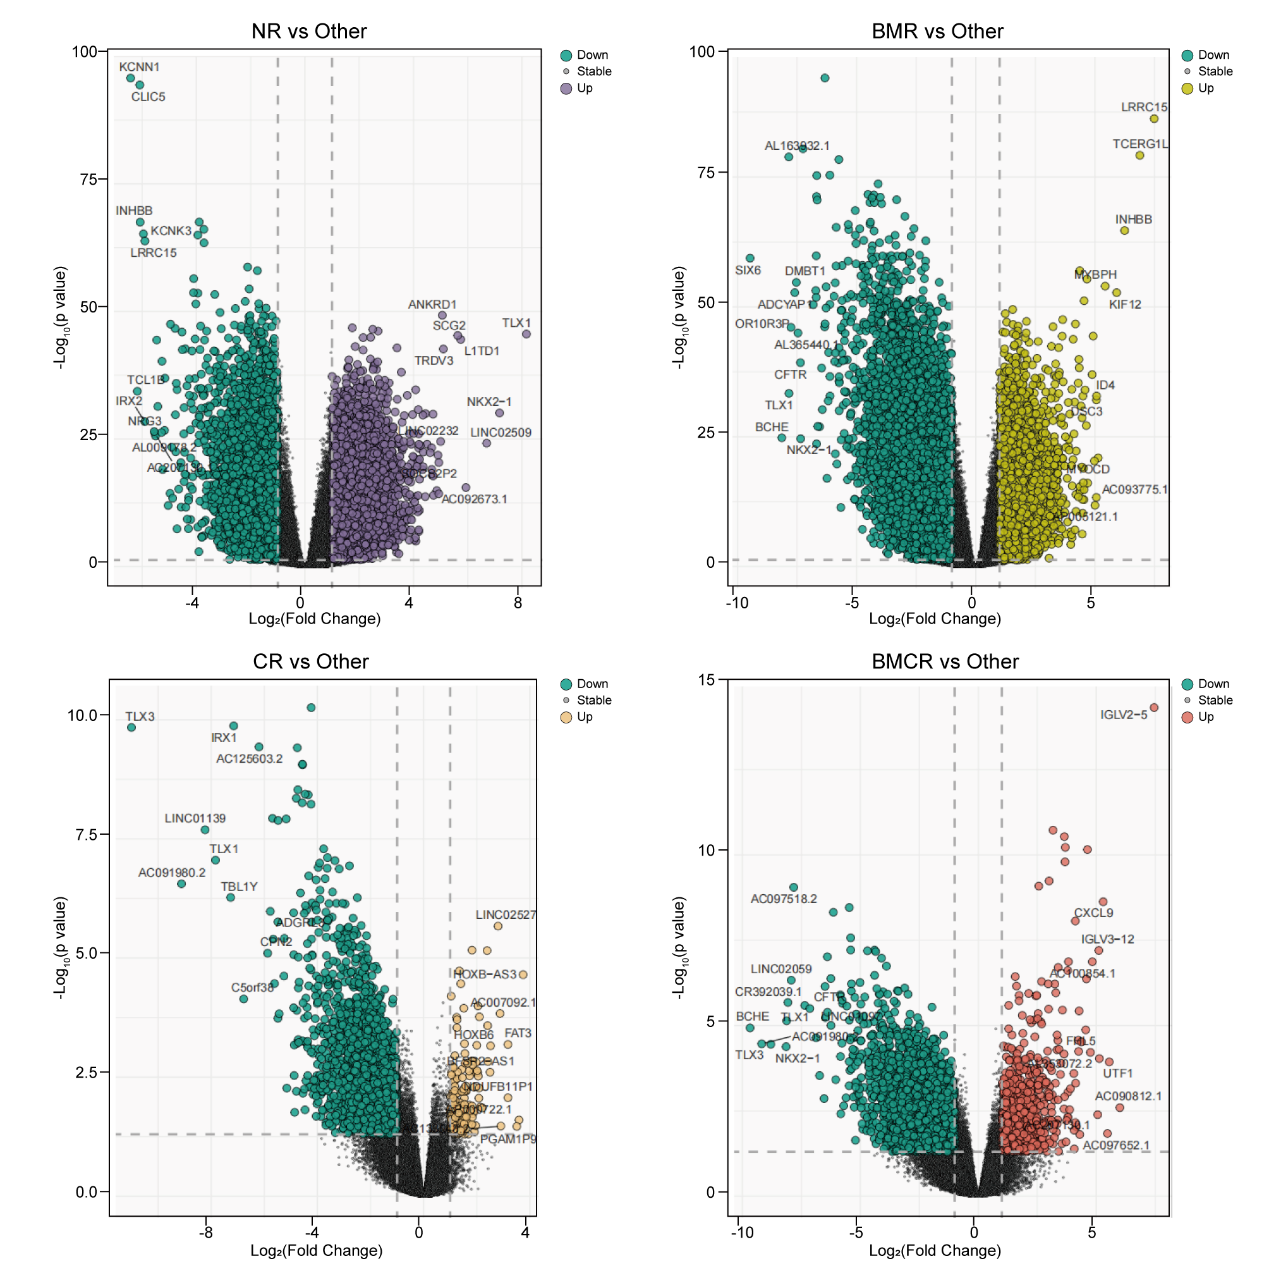


**Fig. S5. Differential Gene Expression Volcano Plots for ALL Relapse Outcome Groups**

Volcano plots displaying differential gene expression profiles in comparison groups. Genes with p<0.05 and top 10 absolute log2FC values are labeled with gene symbols.


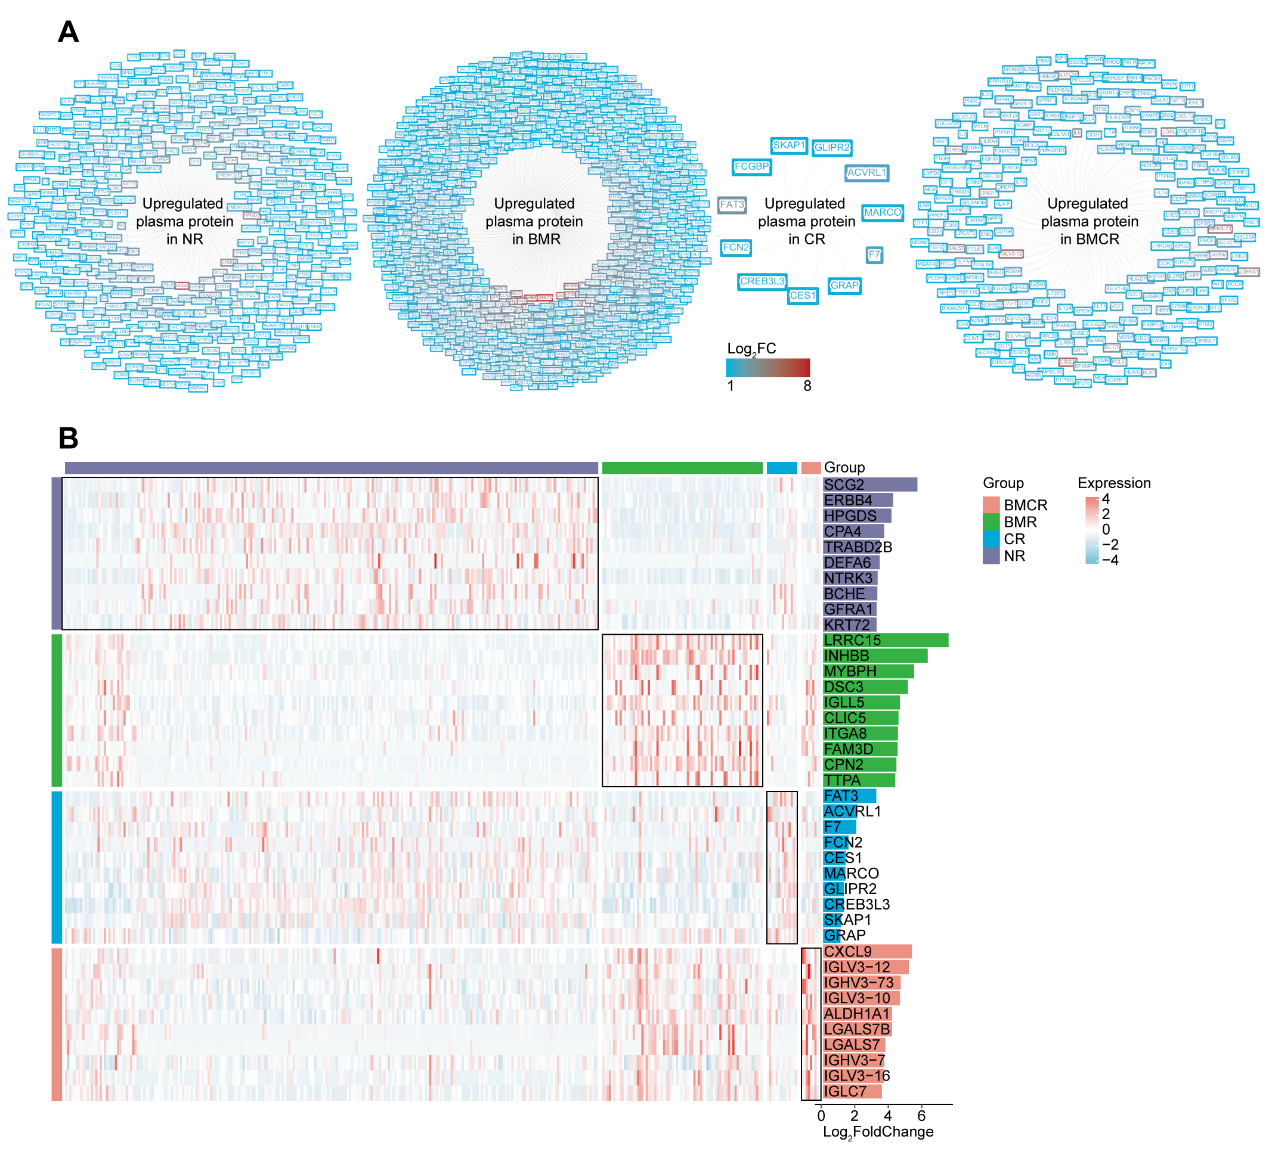


**Fig. S6. Detailed Characterization of Upregulated Plasma Protein-Coding Genes in ALL Relapse Outcomes**

(A) Network plot detailing group-specific upregulated plasma protein-coding genes. (B) Heatmap and bar plot showing expression profiles of top 10 differentially expressed plasma protein-coding genes (ranked by log2FC).

*
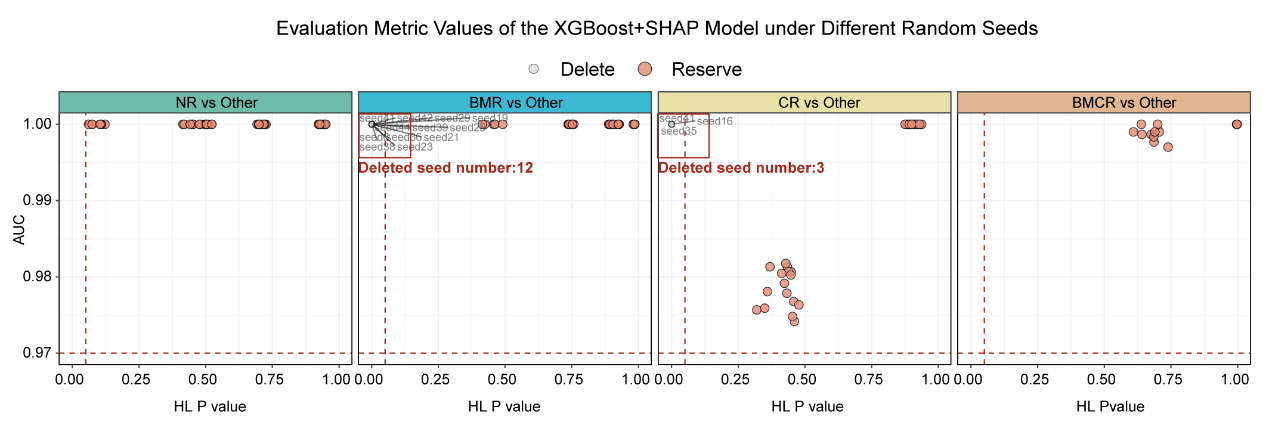
*

**Fig. S7. Discrimination and Calibration Performance of 50 Pre-Trainings in ALL Relapse Outcomes**

Group-specific candidate genes underwent 50 randomized pre-trainings with optimized XGBoost. Bubble plots display AUC values and HL p-values for each iteration, with AUC>0.95 (discriminatory power) and HL p>0.05 (calibration) reserved from subsequent analysis.


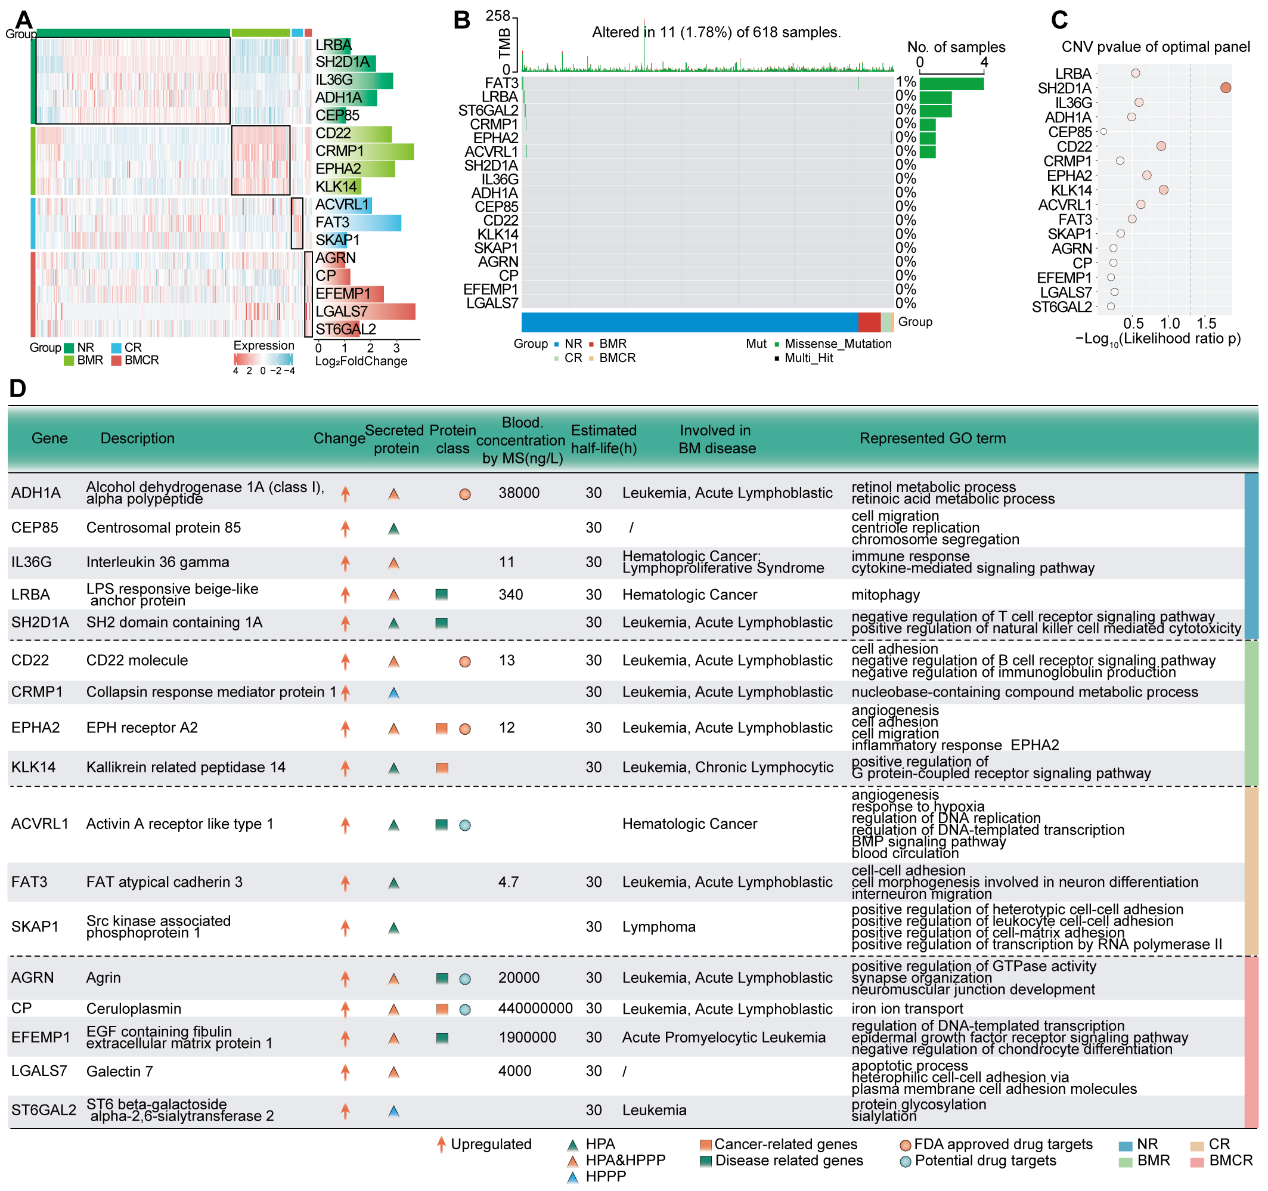


**Fig. S8. Multi-Omics and Functional Characterization of Optimal Monitoring Panels**

(A) Heatmap and bar plot showing intergroup expression differences of panel genes. (B) Mutation waterfall plot displaying genomic alterations in panel genes. (C) Bubble plot showing p-values for CNV differences in panel genes across groups. (D) Functional annotation of panel genes, including protein class, half-life, disease associations, GO enrichment, etc.


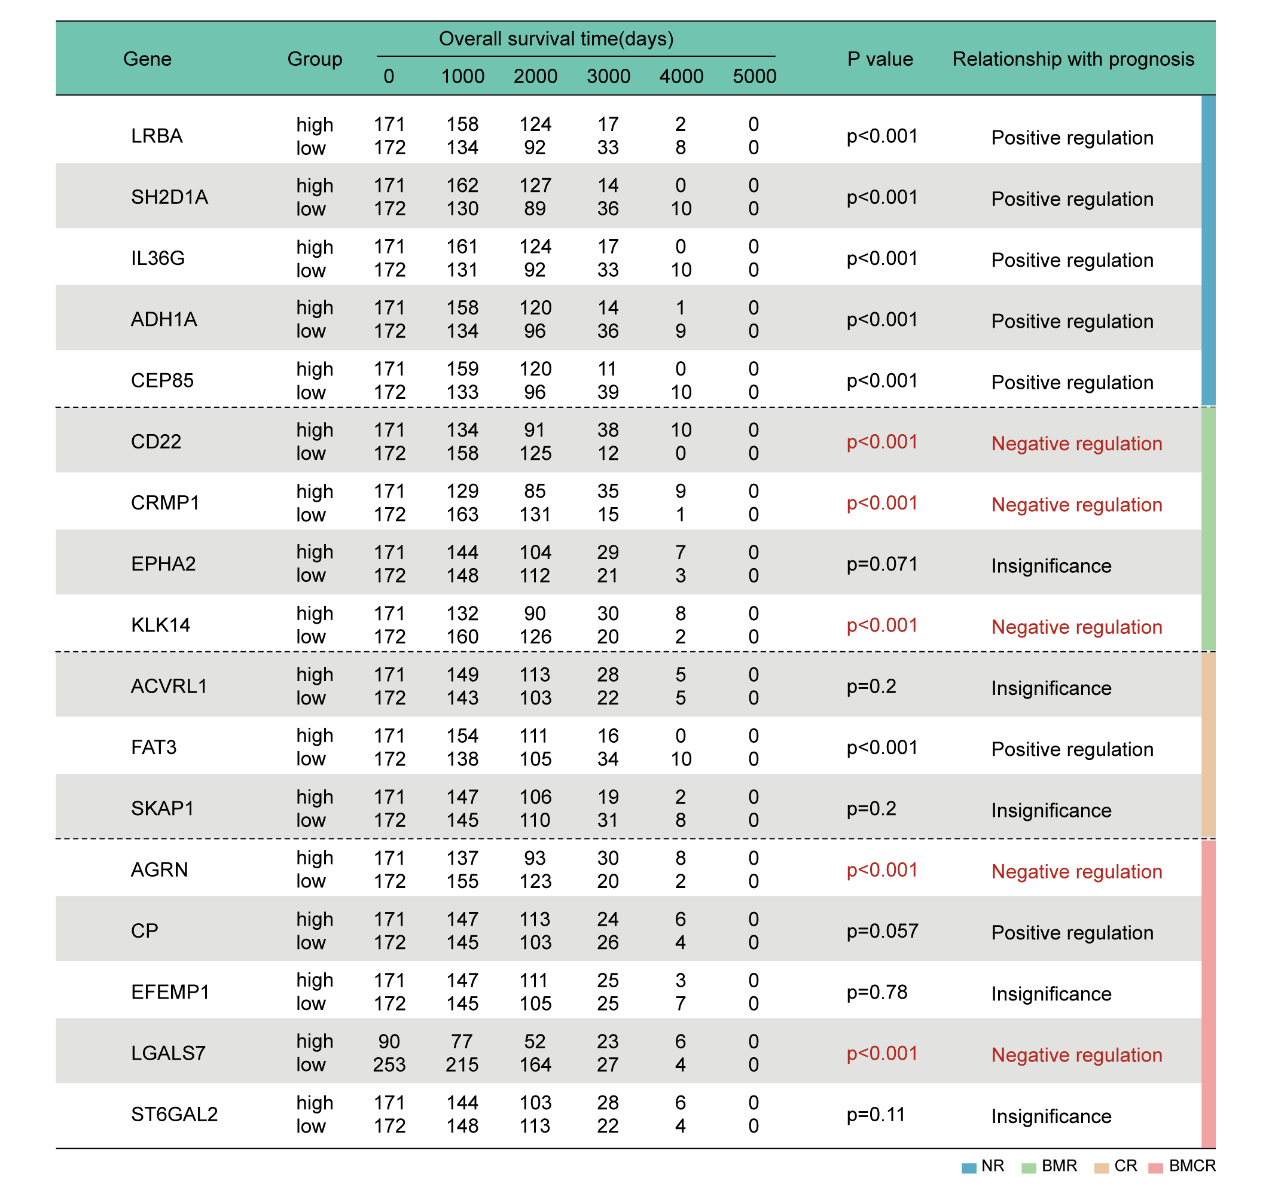


**Fig. S9. Overall Survival Analysis of Genes in Optimal Monitoring Panels**

Clinical samples were stratified into high/low expression groups based on median gene expression levels. Kaplan-Meier plots illustrate associations between the expression levels of panel genes and overall survival in each relapse group.


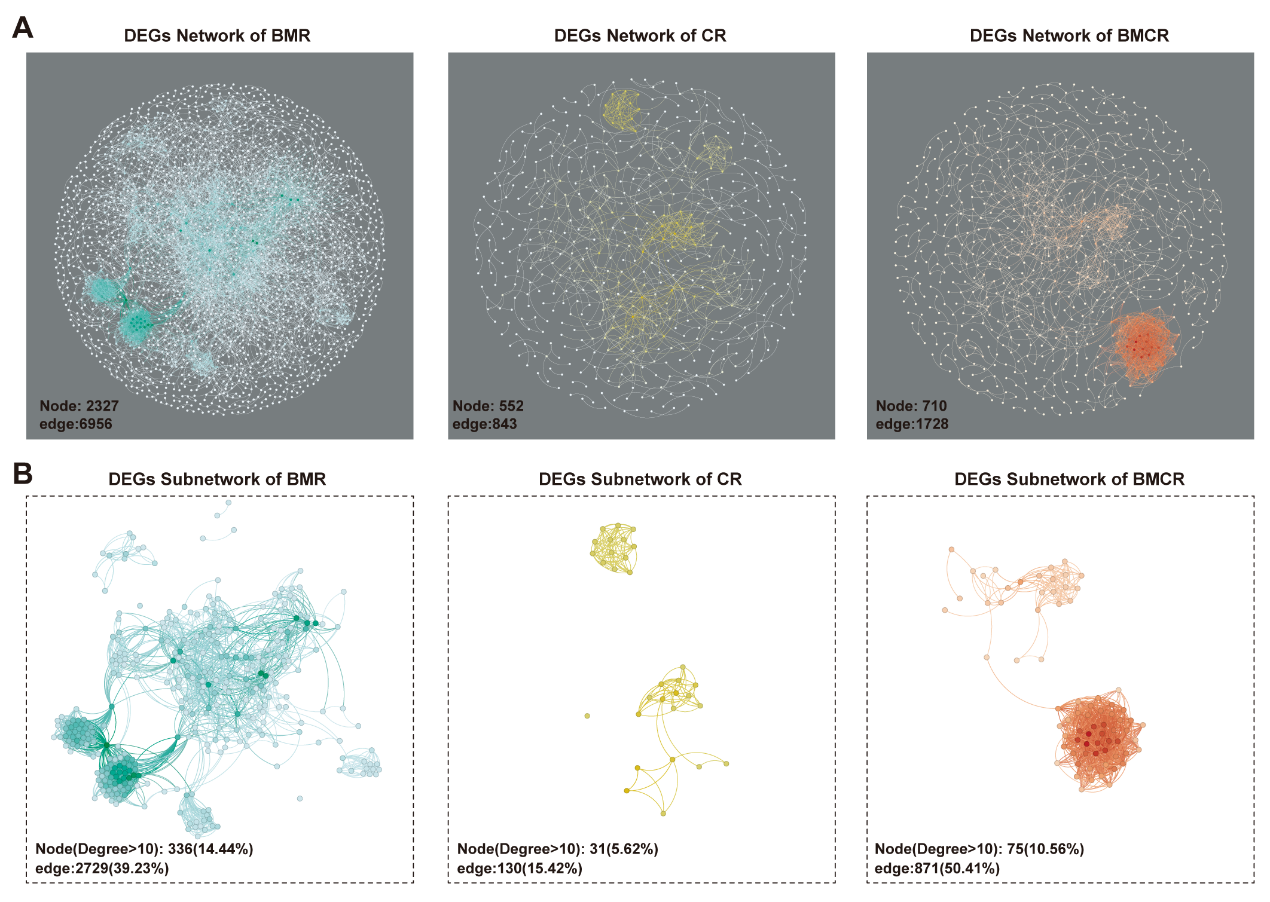


**Fig. S10. Construction of Protein-Protein Interaction Networks and Subnetwork Extraction for DEGs in ALL Relapse Outcomes**

(A) Network plots of group-specific DEGs constructed using the STRING database. (B) Subnetwork visualization of DEGs with degree>10 in each group.


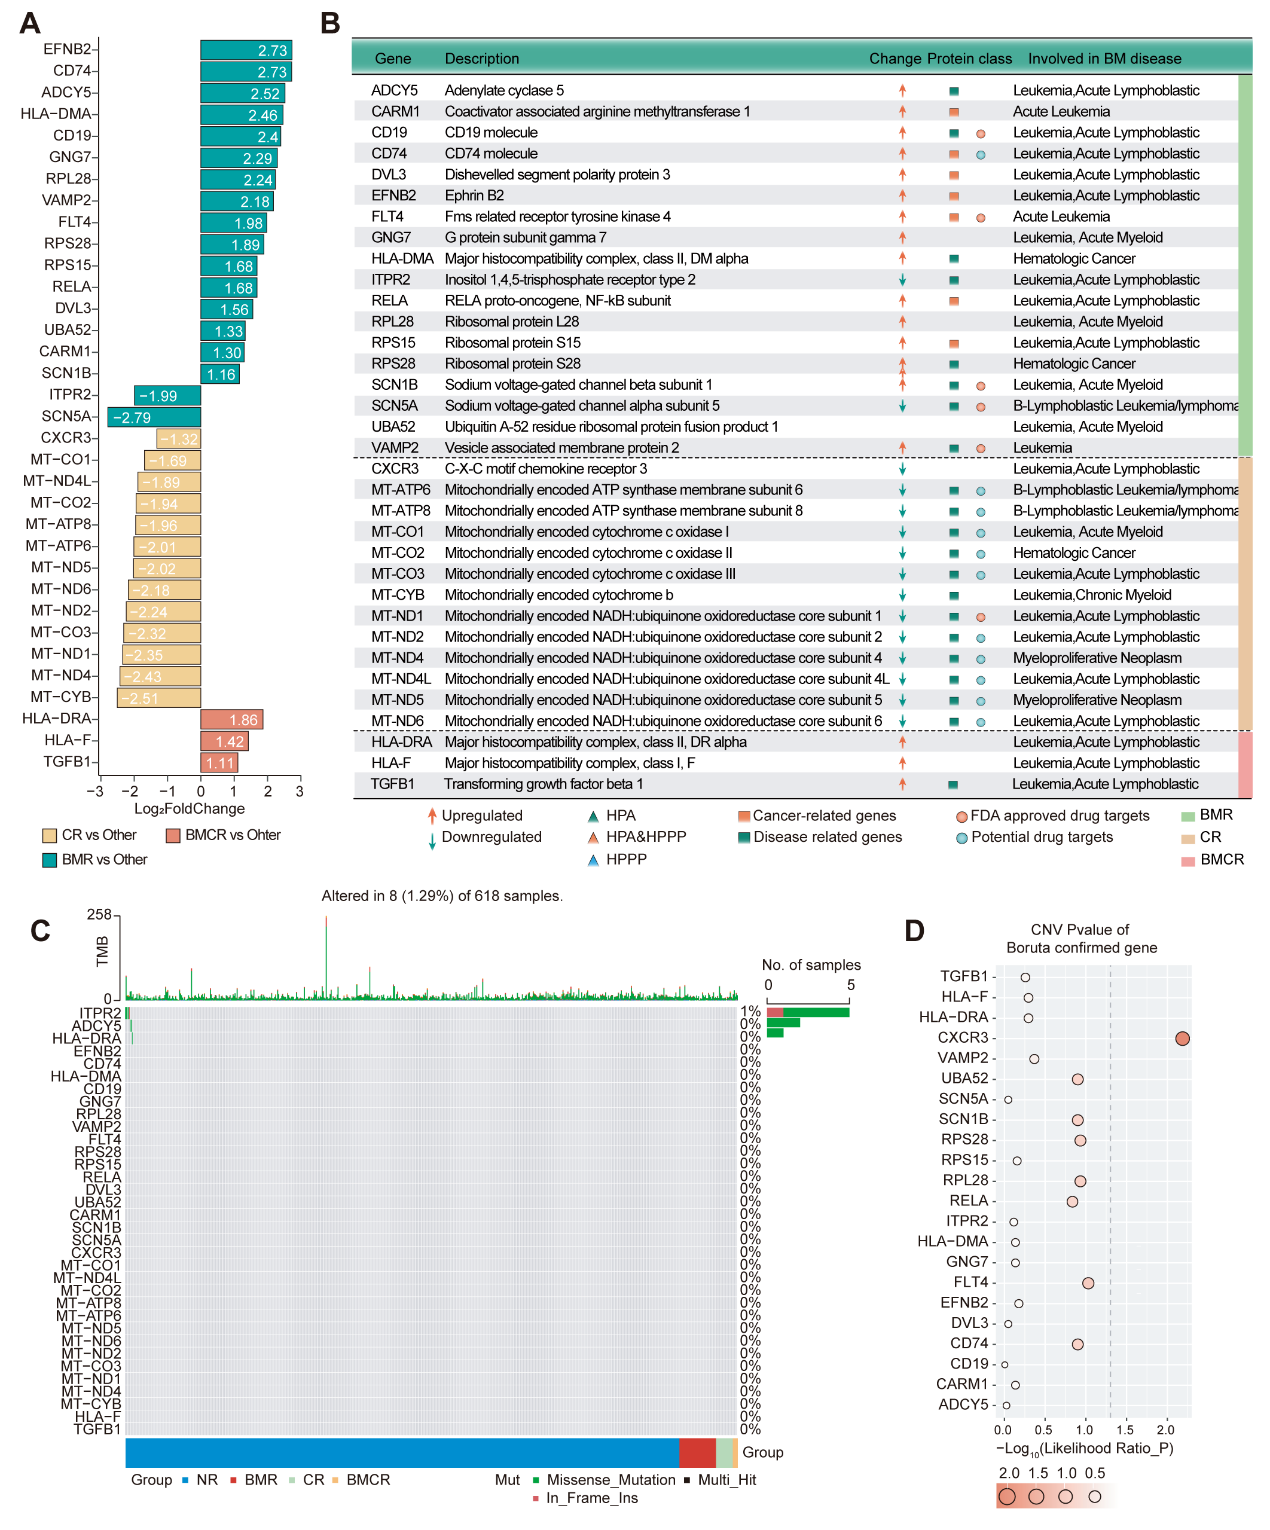


**Fig. S11. Multi-Omics and Disease Association Analysis of Hub Genes in ALL Relapse Outcomes**

(A) Bar plot showing log2FC values of hub genes in each group. (B) Functional annotation of hub genes, including protein classification, disease associations, etc. (C) Mutation waterfall plot displaying genomic alterations in hub genes. (D) Bubble plot showing p-values for CNV differences in hub genes across groups.


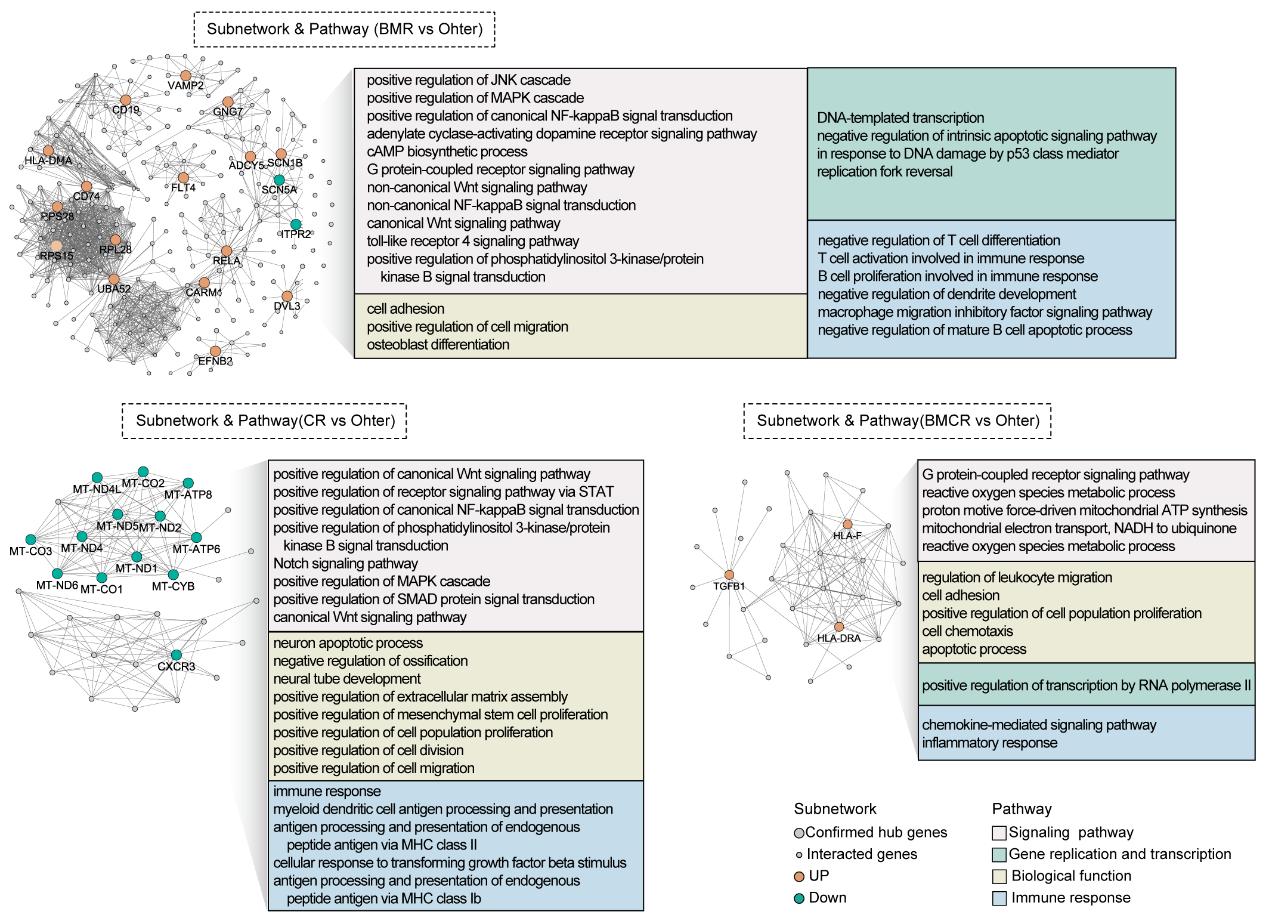


**Fig. S12. Subnetwork Visualization and Functional Enrichment Analysis of Hub Genes**

Subnetworks regulated by hub genes were extracted and subjected to DAVID GO enrichment analysis. Functional modules are color-coded to represent distinct biological processes.
